# Supplementary material
Source: PubMed Central journal article supplement (PMC7269863)

## **ONLINE SUPPLEMENTARY MATERIALS**

Supplemental table 1: Baseline characteristics of study cohort, by race/ethnicity

Supplemental table 2: Association between diabetes status and pancreatic cancer, among specific subgroups

Supplemental table 3: Association between incident diabetes duration and pancreatic cancer, among specific subgroups

Supplemental table 4: Predicted trends for longitudinal measurements of fasting glucose, HbA1c and weight among incident diabetes patients who developed pancreatic cancer

Supplemental figure 1: Predicted mean values of fasting glucose during the three years prior to diabetes for (a) Asians, (b) blacks, (c) Hispanics and (d) whites, across pancreatic cancer status

Supplemental figure 2: Predicted mean values of HbA1c during the three years prior to diabetes for (a) Asians, (b) blacks, (c) Hispanics and (d) whites, across pancreatic cancer status

Supplemental figure 3: Predicted mean values of weight during the three years prior to diabetes for (a) Asians, (b) blacks, (c) Hispanics and (d) whites, across pancreatic cancer status

Supplemental figure 4: Predicted mean values of (a) fasting glucose, (b) HbA1c and (c) weight during the five years prior to pancreatic cancer diagnosis, among incident diabetes patients who developed pancreatic cancer

**Supplemental table 1: Baseline characteristics of study cohort, by race/ethnicity**

| Characteristic                               | Total<br>(N=1,499,627) |      | Asian<br>(N=166,395) |      | Black<br>(N=160,228) |      | Hispanic<br>(N=487,185) |      | White<br>(N=685,819) |      |
|----------------------------------------------|------------------------|------|----------------------|------|----------------------|------|-------------------------|------|----------------------|------|
|                                              | N                      | %    | N                    | %    | N                    | %    | N                       | %    | N                    | %    |
| Pancreatic cancer cases                      | 2,002                  | 0.1  | 174                  | 0.1  | 270                  | 0.2  | 461                     | 0.1  | 1,097                | 0.2  |
| Person-years, total                          | 7,462,072.5            |      | 829,641.2            |      | 859,927.9            |      | 2,254,357.7             |      | 3,518,145.7          |      |
| Follow-up time (years), mean (SD)            | 5.0 (3.0)              |      | 5.0 (3.0)            |      | 5.4 (3.0)            |      | 4.6 (3.0)               |      | 5.1 (2.9)            |      |
| Time to pancreatic cancer (years), mean (SD) | 3.8 (2.5)              |      | 4.0 (2.6)            |      | 3.8 (2.4)            |      | 4.0 (2.6)               |      | 3.7 (2.5)            |      |
| Incidence rate, unadjusted                   | 26.8                   |      | 21.0                 |      | 31.4                 |      | 20.4                    |      | 31.2                 |      |
| Incidence rate, age-adjusted <sup>1</sup>    | 30.7                   |      | 27.5                 |      | 36.2                 |      | 29.0                    |      | 31.2                 |      |
| Age, mean (SD)                               | 57.9 (10.9)            |      | 57.0 (10.2)          |      | 57.4 (10.9)          |      | 55.2 (10.0)             |      | 60.1 (11.3)          |      |
| Age group                                    |                        |      |                      |      |                      |      |                         |      |                      |      |
| 45-50                                        | 433,225                | 28.9 | 49,638               | 29.8 | 49,542               | 30.9 | 187,708                 | 38.5 | 146,337              | 21.3 |
| 50-54                                        | 249,754                | 16.7 | 28,156               | 16.9 | 26,612               | 16.6 | 89,481                  | 18.4 | 105,505              | 15.4 |
| 55-59                                        | 227,267                | 15.2 | 27,130               | 16.3 | 23,779               | 14.8 | 69,596                  | 14.3 | 106,762              | 15.6 |
| 60-64                                        | 191,088                | 12.7 | 22,710               | 13.7 | 18,827               | 11.8 | 48,295                  | 9.9  | 101,256              | 14.8 |
| 65-69                                        | 153,534                | 10.2 | 17,265               | 10.4 | 15,718               | 9.8  | 39,832                  | 8.2  | 80,719               | 11.8 |
| ≥70                                          | 244,759                | 16.3 | 21,496               | 12.9 | 25,750               | 16.1 | 52,273                  | 10.7 | 145,240              | 21.2 |
| Gender                                       |                        |      |                      |      |                      |      |                         |      |                      |      |
| F                                            | 827,460                | 55.2 | 95,415               | 57.3 | 95,918               | 59.9 | 268,168                 | 55.0 | 367,959              | 53.7 |
| M                                            | 672,167                | 44.8 | 70,980               | 42.7 | 64,310               | 40.1 | 219,017                 | 45.0 | 317,860              | 46.4 |
| BMI, mean (SD)                               | 29.2 (6.2)             |      | 25.7 (4.4)           |      | 31.0 (6.9)           |      | 30.1 (5.8)              |      | 28.9 (6.2)           |      |
| BMI category                                 |                        |      |                      |      |                      |      |                         |      |                      |      |
| <25                                          | 379,339                | 25.3 | 81,059               | 48.7 | 27,579               | 17.2 | 80,396                  | 16.5 | 190,305              | 27.8 |
| 25-30                                        | 555,925                | 37.1 | 62,532               | 37.6 | 52,919               | 33.0 | 192,659                 | 39.6 | 247,815              | 36.1 |
| ≥30                                          | 564,363                | 37.6 | 22,804               | 13.7 | 79,730               | 49.8 | 214,130                 | 44.0 | 247,699              | 36.1 |
| Smoking status                               |                        |      |                      |      |                      |      |                         |      |                      |      |
| Never/Passive                                | 967,251                | 64.5 | 126,775              | 76.2 | 97,111               | 60.6 | 346,421                 | 71.1 | 396,944              | 57.9 |

|                                     |           |      |         |      |         |      |         |      |         |      |
|-------------------------------------|-----------|------|---------|------|---------|------|---------|------|---------|------|
| Past                                | 392,214   | 26.2 | 29,402  | 17.7 | 42,757  | 26.7 | 103,415 | 21.2 | 216,640 | 31.6 |
| Current                             | 140,162   | 9.4  | 10,218  | 6.1  | 20,360  | 12.7 | 37,349  | 7.7  | 72,235  | 10.5 |
| Alcohol user                        |           |      |         |      |         |      |         |      |         |      |
| No                                  | 864,634   | 57.7 | 122,172 | 73.4 | 96,485  | 60.2 | 304,266 | 62.5 | 341,711 | 49.8 |
| Yes                                 | 634,993   | 42.3 | 44,223  | 26.6 | 63,743  | 39.8 | 182,919 | 37.6 | 344,108 | 50.2 |
| Education <sup>2</sup>              |           |      |         |      |         |      |         |      |         |      |
| High school or less                 | 586,579   | 39.1 | 9,856   | 5.9  | 3,670   | 2.3  | 24,690  | 5.1  | 33,033  | 4.8  |
| Some college                        | 523,205   | 34.9 | 53,529  | 32.2 | 72,130  | 45.0 | 285,010 | 58.5 | 175,910 | 25.7 |
| College graduate                    | 318,594   | 21.2 | 47,225  | 28.4 | 64,266  | 40.1 | 127,466 | 26.2 | 284,248 | 41.5 |
| Missing                             | 71,249    | 4.8  | 55,785  | 33.5 | 20,162  | 12.6 | 50,019  | 10.3 | 192,628 | 28.1 |
| Family history of pancreatic cancer | 16,066    | 1.1  | 1,706   | 1.0  | 1,487   | 0.9  | 4,518   | 0.9  | 8,355   | 1.2  |
| Pancreatitis                        | 18,418    | 1.2  | 1,304   | 0.8  | 2,866   | 1.8  | 5,956   | 1.2  | 8,292   | 1.2  |
| Diabetes status                     |           |      |         |      |         |      |         |      |         |      |
| None                                | 1,055,996 | 70.4 | 110,579 | 66.5 | 103,112 | 64.4 | 327,726 | 67.3 | 514,579 | 75.0 |
| Incident                            | 110,699   | 7.4  | 14,836  | 8.9  | 14,730  | 9.2  | 36,892  | 7.6  | 44,241  | 6.5  |
| Prevalent                           | 332,932   | 22.2 | 40,980  | 24.6 | 42,386  | 26.5 | 122,567 | 25.2 | 126,999 | 18.5 |

<sup>1</sup>Incidence rate per 100,000 person-years, age-standardized to US Census 2000 standard population, truncated to ages 45+.

<sup>2</sup>Based on population geocoding files and not specific to individual patient.

All tests comparing distribution of risk factors across race/ethnicity had p-values <0.0001.

**Supplemental table 2: Association between diabetes status and pancreatic cancer, among specific subgroups**

| Subgroup                 | No diabetes |              |                          | Incident diabetes <sup>1</sup> |              |                          | Prevalent diabetes |              |                          | p <sup>3</sup> |
|--------------------------|-------------|--------------|--------------------------|--------------------------------|--------------|--------------------------|--------------------|--------------|--------------------------|----------------|
|                          | N Cases     | Person-years | RR (95% CI) <sup>2</sup> | N Cases                        | Person-years | RR (95% CI) <sup>2</sup> | N Cases            | Person-years | RR (95% CI) <sup>2</sup> |                |
| Gender                   |             |              |                          |                                |              |                          |                    |              |                          | 0.75           |
| Females                  | 521         | 2,993,149.9  | 1 (ref)                  | 171                            | 396,488.0    | 3.27 (2.70-3.96)         | 355                | 2,067,194.6  | 1.85 (1.61-2.14)         |                |
| Males                    | 416         | 2,067,194.6  | 1 (ref)                  | 135                            | 329,567.0    | 3.05 (2.48-3.76)         | 404                | 849,473.1    | 1.85 (1.60-2.14)         |                |
| BMI (kg/m <sup>2</sup> ) |             |              |                          |                                |              |                          |                    |              |                          | 0.40           |
| <25                      | 303         | 1,516,627.4  | 1 (ref)                  | 55                             | 108,002.9    | 2.89 (2.10-3.99)         | 142                | 262,633.0    | 1.76 (1.42-2.17)         |                |
| 25-30                    | 373         | 1,985,713.6  | 1 (ref)                  | 125                            | 241,533.6    | 3.62 (2.91-4.51)         | 284                | 554,451.0    | 1.96 (1.66-2.30)         |                |
| ≥30                      | 261         | 1,558,003.5  | 1 (ref)                  | 126                            | 376,518.5    | 2.88 (2.29-3.61)         | 333                | 858,589.1    | 1.79 (1.51-2.11)         |                |
| Smoking status           |             |              |                          |                                |              |                          |                    |              |                          | 0.02           |
| Never                    | 501         | 3,377,796.1  | 1 (ref)                  | 172                            | 447,694.9    | 3.35 (2.77-4.06)         | 428                | 992,526.0    | 2.13 (1.86-2.44)         |                |
| Past                     | 313         | 1,232,906.0  | 1 (ref)                  | 97                             | 200,397.7    | 3.02 (2.36-3.85)         | 251                | 546,545.1    | 1.50 (1.26-1.79)         |                |
| Current                  | 123         | 449,642.3    | 1 (ref)                  | 37                             | 77,962.4     | 2.81 (1.87-4.22)         | 80                 | 136,602.0    | 1.75 (1.29-2.36)         |                |
| Alcohol user             |             |              |                          |                                |              |                          |                    |              |                          | 0.86           |
| No                       | 509         | 2,745,676.0  | 1 (ref)                  | 185                            | 444,507.4    | 3.11 (2.59-3.73)         | 534                | 1,146,417.6  | 1.85 (1.63-2.11)         |                |
| Yes                      | 428         | 2,314,668.5  | 1 (ref)                  | 121                            | 281,547.6    | 3.30 (2.63-4.13)         | 225                | 529,255.4    | 1.85 (1.56-2.19)         |                |
| Pancreatitis             |             |              |                          |                                |              |                          |                    |              |                          | 0.10           |
| No                       | 912         | 5,017,861.9  | 1 (ref)                  | 295                            | 717,016.4    | 3.20 (2.77-3.69)         | 728                | 1,633,082.8  | 1.89 (1.70-2.09)         |                |
| Yes                      | 25          | 42,482.6     | 1 (ref)                  | 11                             | 9,038.6      | 2.06 (0.83-5.09)         | 31                 | 42,590.3     | 1.03 (0.61-1.74)         |                |

<sup>1</sup>Incident diabetes treated as a time-varying exposure.

<sup>2</sup>From a Cox proportional hazards regression with age at cohort entry, gender, race, smoking, BMI, alcohol, pancreatitis, family history of pancreatic cancer and education as covariates.

<sup>3</sup>P-values for heterogeneity across particular subgroup.

**Supplemental table 3: Association between incident diabetes duration and pancreatic cancer, among specific subgroups**

| Subgroup                 | No diabetes |              |                          | Incident diabetes ≤1 year <sup>1</sup> |              |                          | Incident diabetes >1 year <sup>1</sup> |              |                          | p <sup>3</sup> |
|--------------------------|-------------|--------------|--------------------------|----------------------------------------|--------------|--------------------------|----------------------------------------|--------------|--------------------------|----------------|
|                          | N Cases     | Person-years | RR (95% CI) <sup>2</sup> | N Cases                                | Person-years | RR (95% CI) <sup>2</sup> | N Cases                                | Person-years | RR (95% CI) <sup>2</sup> |                |
| Gender                   |             |              |                          |                                        |              |                          |                                        |              |                          | 0.09           |
| Female                   | 521         | 2,993,149.9  | 1 (ref)                  | 91                                     | 54,946.7     | 6.42 (4.94-8.33)         | 80                                     | 341,541.2    | 2.29 (1.79-2.93)         |                |
| Male                     | 416         | 2,067,194.6  | 1 (ref)                  | 84                                     | 47,764.8     | 7.42 (5.74-9.58)         | 51                                     | 281,802.2    | 1.60 (1.18-2.17)         |                |
| BMI (kg/m <sup>2</sup> ) |             |              |                          |                                        |              |                          |                                        |              |                          | 0.35           |
| <25                      | 303         | 1,516,627.4  | 1 (ref)                  | 36                                     | 18,627.6     | 6.51 (4.34-9.76)         | 19                                     | 89,375.3     | 1.61 (1.00-2.59)         |                |
| 25-30                    | 373         | 1,985,713.6  | 1 (ref)                  | 73                                     | 35,958.6     | 8.32 (6.29-11.00)        | 52                                     | 205,575.0    | 2.15 (1.60-2.91)         |                |
| ≥30                      | 261         | 1,558,003.5  | 1 (ref)                  | 66                                     | 48,125.3     | 5.91 (4.39-7.97)         | 60                                     | 328,393.2    | 1.97 (1.46-2.65)         |                |
| Smoking status           |             |              |                          |                                        |              |                          |                                        |              |                          | 0.63           |
| Never                    | 501         | 3,377,796.1  | 1 (ref)                  | 101                                    | 62,999.4     | 7.67 (5.99-9.81)         | 71                                     | 384,695.5    | 2.02 (1.55-2.62)         |                |
| Past                     | 313         | 1,232,906.0  | 1 (ref)                  | 52                                     | 27,922.0     | 6.07 (4.39-8.38)         | 45                                     | 172,475.7    | 2.03 (1.47-2.81)         |                |
| Current                  | 123         | 449,642.3    | 1 (ref)                  | 22                                     | 11,790.2     | 6.33 (3.83-10.46)        | 15                                     | 66,172.2     | 1.57 (0.88-2.81)         |                |
| Alcohol user             |             |              |                          |                                        |              |                          |                                        |              |                          | 0.52           |
| No                       | 509         | 2,745,676.0  | 1 (ref)                  | 101                                    | 61,959.7     | 6.46 (5.08-8.21)         | 84                                     | 382,547.7    | 2.03 (1.59-2.59)         |                |
| Yes                      | 428         | 2,314,668.5  | 1 (ref)                  | 74                                     | 40,751.8     | 7.67 (5.79-10.16)        | 47                                     | 240,795.8    | 1.85 (1.35-2.54)         |                |

<sup>1</sup>Incident diabetes duration treated as a time-varying exposure.

<sup>2</sup>From a Cox proportional hazards regression with age at cohort entry, gender, race, smoking, BMI, alcohol, pancreatitis, family history of pancreatic cancer and education as covariates.

<sup>3</sup>P-values for heterogeneity across particular subgroup.

**Supplemental table 4: Predicted trends for longitudinal measurements of fasting glucose, HbA1c and weight among incident diabetes patients who developed pancreatic cancer**

| Parameter <sup>1</sup>     | Estimate (CI) <sup>2</sup> |
|----------------------------|----------------------------|
| Glucose (mg/dL)            |                            |
| Slope 5 yrs-1.5 yrs        | 0.49 (-0.31–1.29)          |
| Change in slope at 1.5 yrs | 10.17 (7.36–12.98)         |
| HbA1c (%)                  |                            |
| Slope 5 yrs-1.5 yrs        | 0.09 (0.05–0.12)           |
| Change in slope at 1.5 yrs | 0.17 (0.08–0.27)           |
| Weight (kg)                |                            |
| Slope 5 yrs-1.5 yrs        | 0.27 (0.00–0.55)           |
| Change in slope at 1.5 yrs | -2.50 (-2.94–2.05)         |

<sup>1</sup>Metabolic markers were evaluated from pancreatic cancer diagnosis up to five years prior in six month intervals.

<sup>2</sup>From a GEE model with the metabolic characteristic as a continuous outcome variable (identity link), time period as the main exposure, age, gender and race as covariates, and patient as the clustering variable. All models included a spline term at the 2-1.5 yr time interval to model the change in slope.

**Supplemental figure 1: Predicted mean values of fasting glucose during the three years prior to diabetes for (a) Asians, (b) blacks, (c) Hispanics and (d) whites, across pancreatic cancer status**

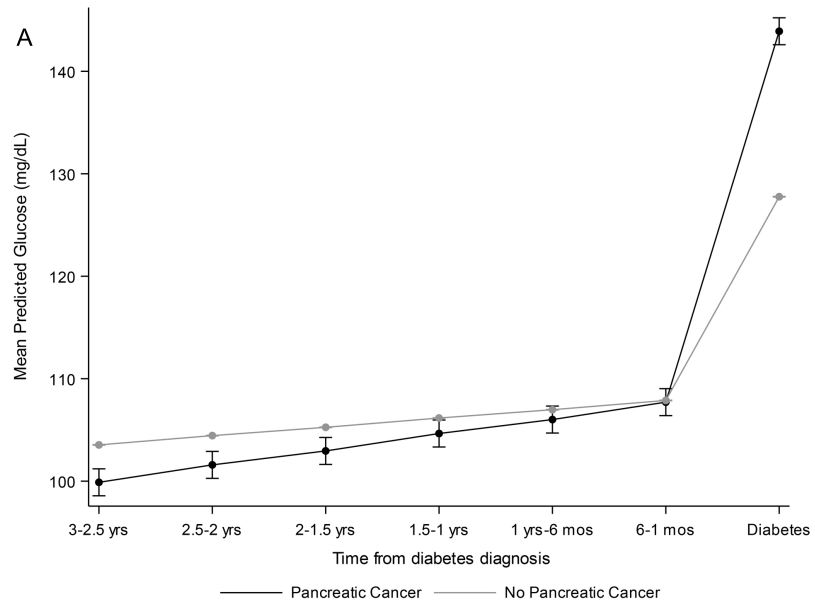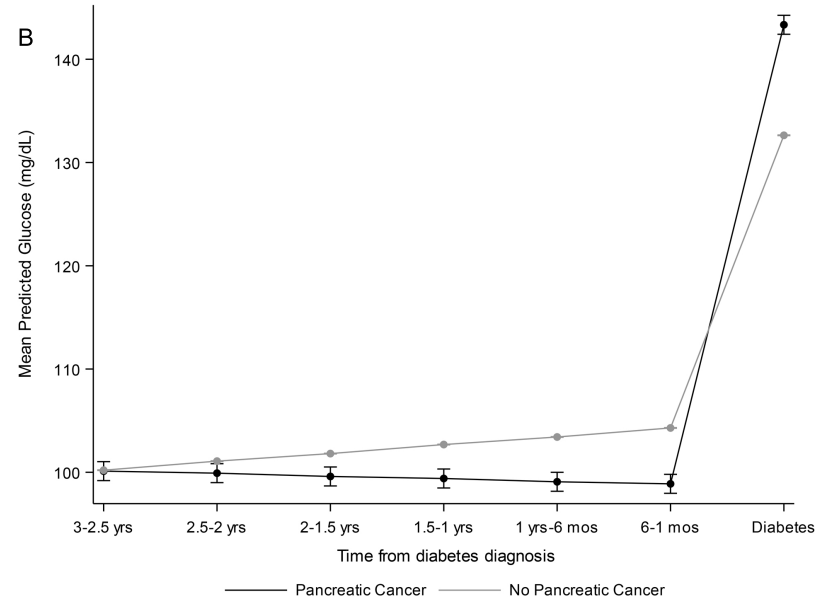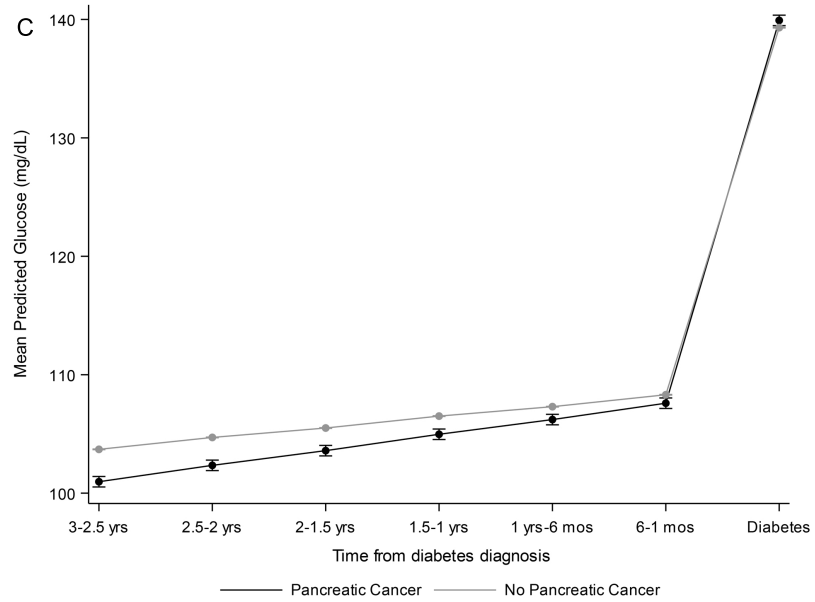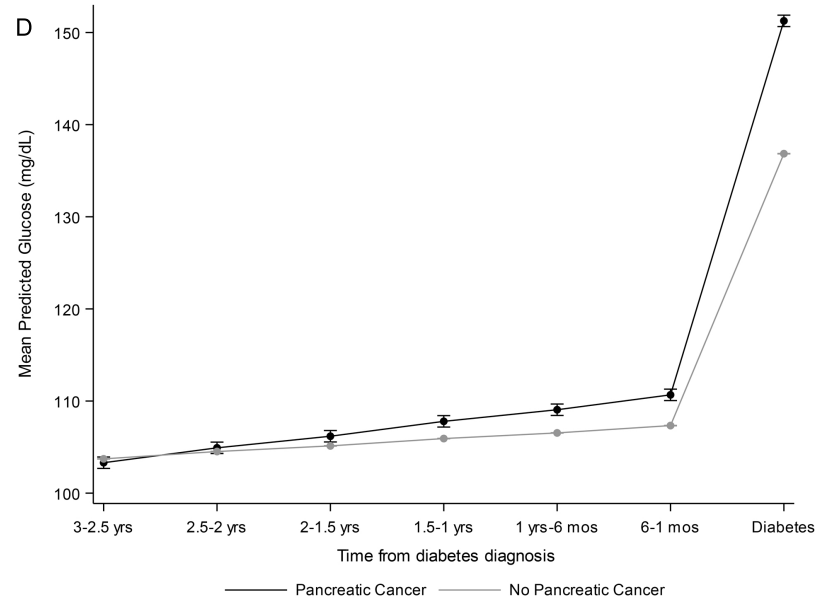

**Supplemental figure 2: Predicted mean values of HbA1c during the three years prior to diabetes for (a) Asians, (b) blacks, (c) Hispanics and (d) whites, across pancreatic cancer status**

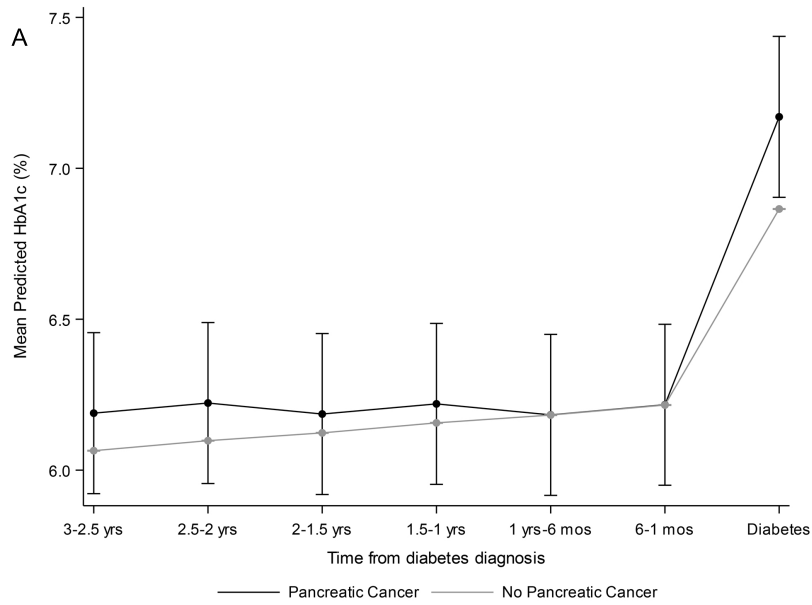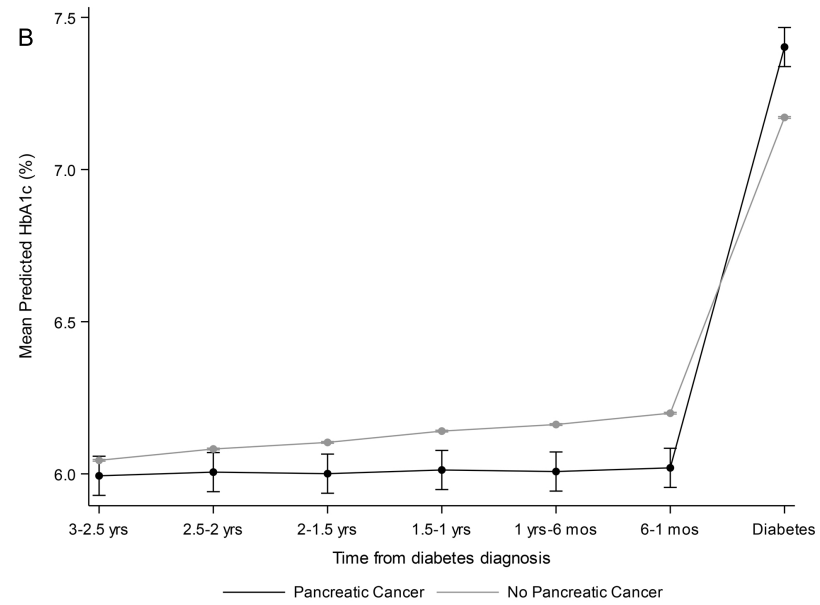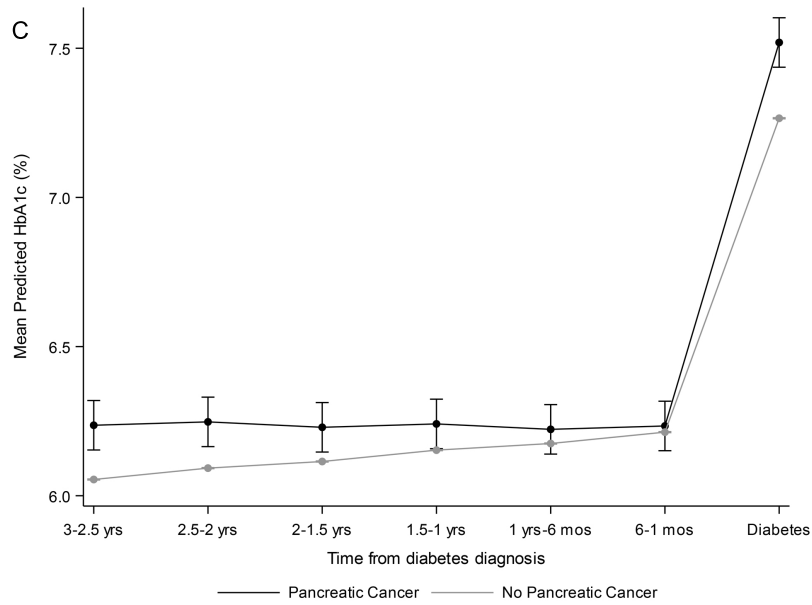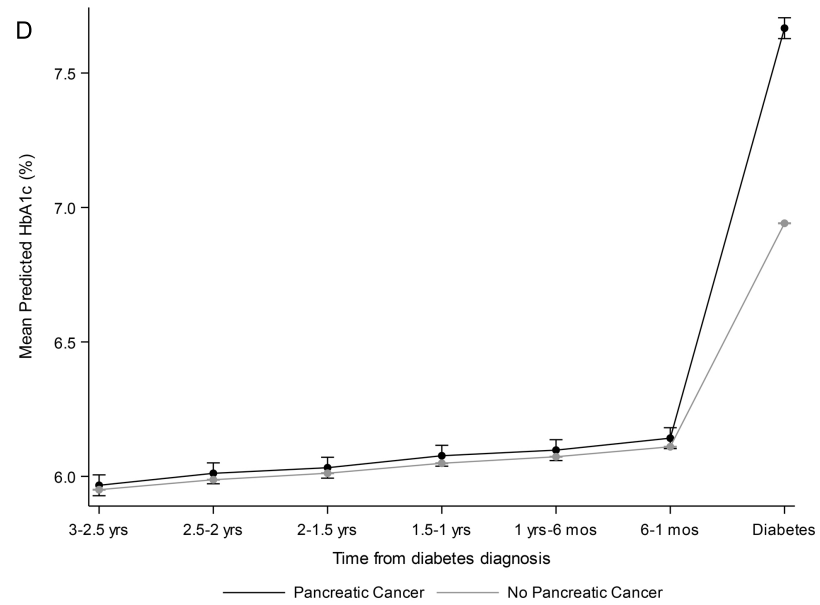



**Supplemental figure 3: Predicted mean values of weight during the three years prior to diabetes for (a) Asians, (b) blacks, (c) Hispanics and (d) whites, across pancreatic cancer status**

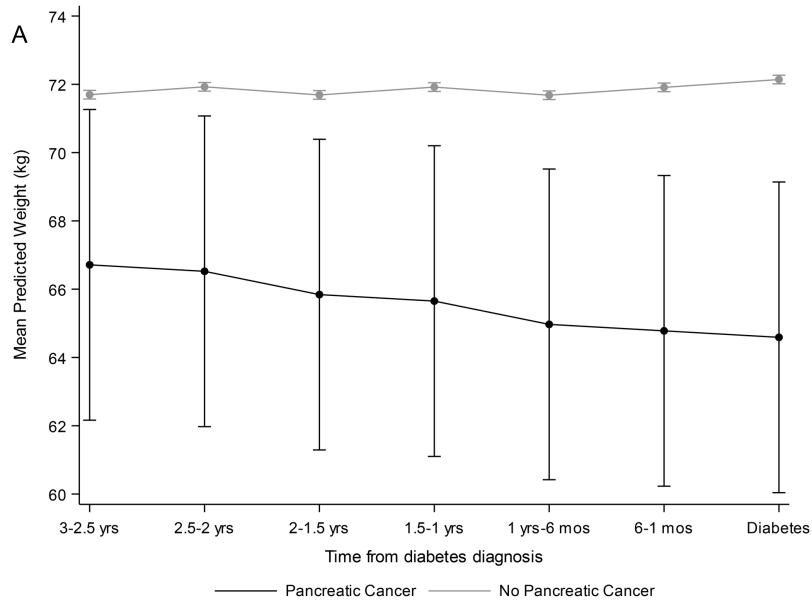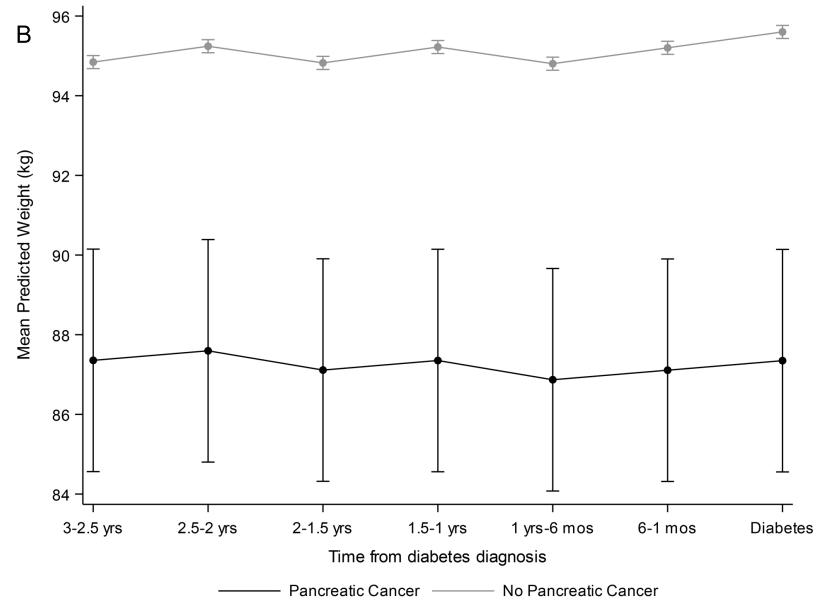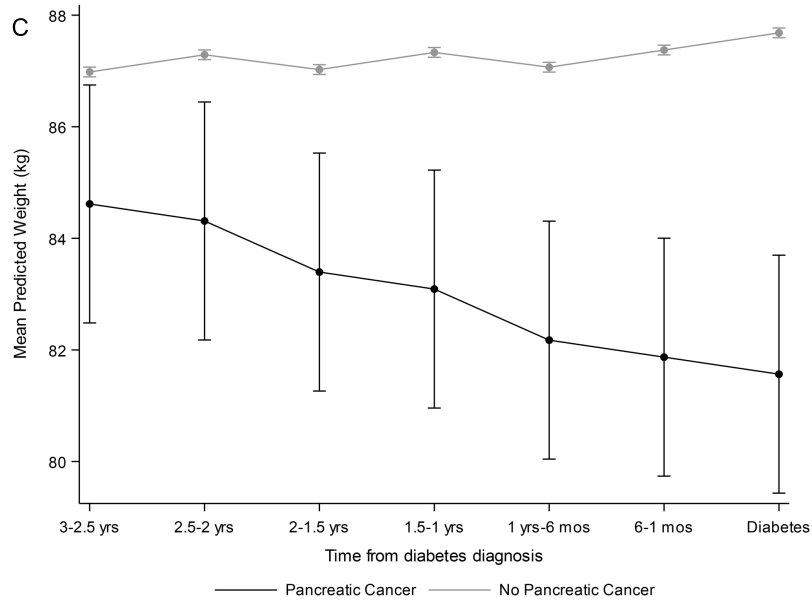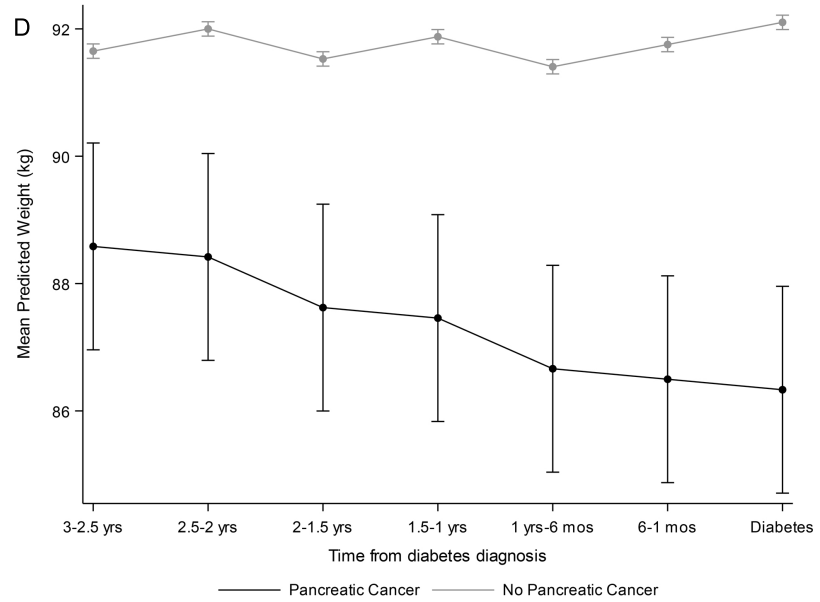

**Supplemental figure 4: Predicted mean values of (a) fasting glucose, (b) HbA1c and (c) weight during the five years prior to pancreatic cancer diagnosis, among incident diabetes patients who developed pancreatic cancer**

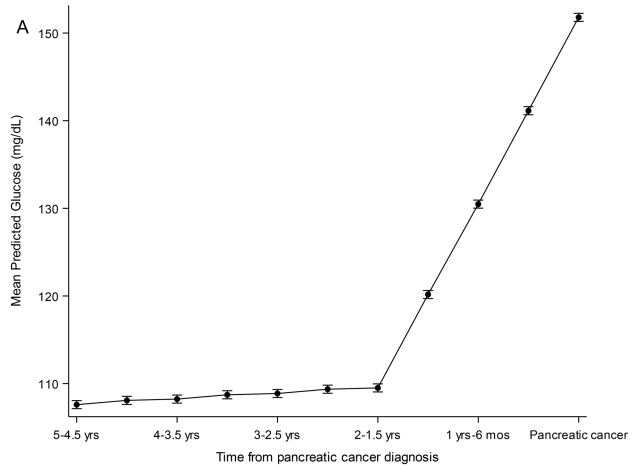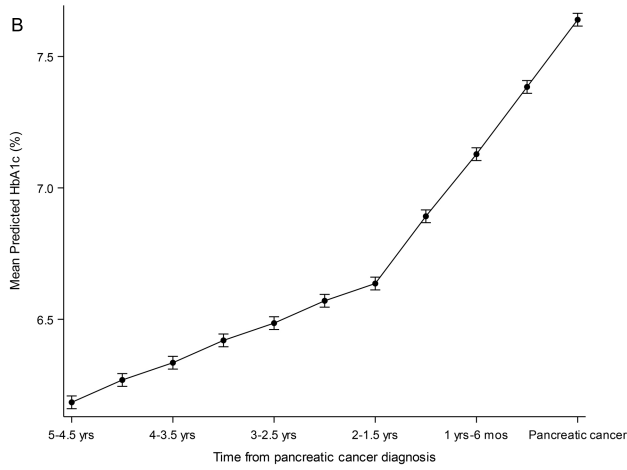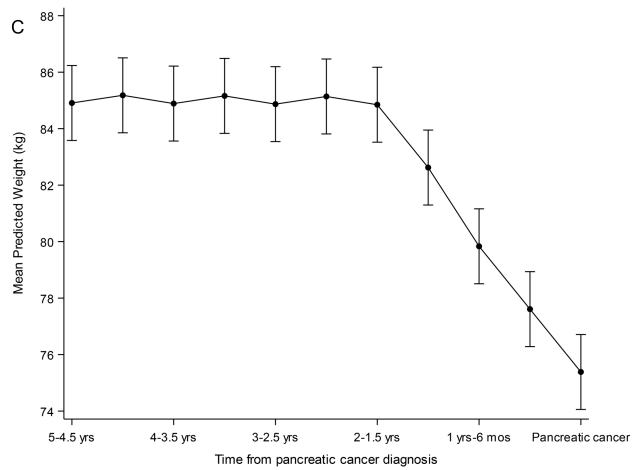

Supplement: NIHMS1545916-supplement-1.pdf [file NIHMS1545916-supplement-1.pdf]
